# Supplementary material for: Lightweight and flexible hybrid film based on delicate design of electrospun nanofibers for high-performance electromagnetic interference shielding
Source: Royal Society of Chemistry journal article supplement (doi:10.1039/c9nr02102g), 2019-01-01
Supplement: c9nr02102g1.pdf [file c9nr02102g1.pdf]

## ***Supporting Information***

# **Lightweight and Flexible Hybrid Film Based on Delicate Design of Electrospun Nanofibers for High-Performance Electromagnetic Interference Shielding**

Li Huang,<sup>1,3</sup> Jianjun Li,<sup>2,\*</sup> Yibin Li,<sup>2</sup> Xiaodong He,<sup>2</sup> Ye Yuan<sup>1,2\*</sup>

<sup>1</sup> School of Materials Science and Technology, Research Institute for Energy Equipment Materials, Tianjin Key Laboratory of Materials Laminating Fabrication and Interface Control Technology, Hebei University of Technology, Tianjin, 300401, People's Republic of China

<sup>2</sup> National Key Laboratory of Science and Technology on Advanced Composites in Special Environments, Harbin Institute of Technology, Harbin 150080, People's Republic of China

<sup>3</sup> School of Electronic and Information Engineering, Hebei University of Technology, Tianjin, 300401, People's Republic of China

Corresponding Author

E-mail address: [lj8081@hit.edu.cn](mailto:lj8081@hit.edu.cn) (J. Li), [yuanewins@hotmail.com](mailto:yuanewins@hotmail.com) (Y. Yuan)

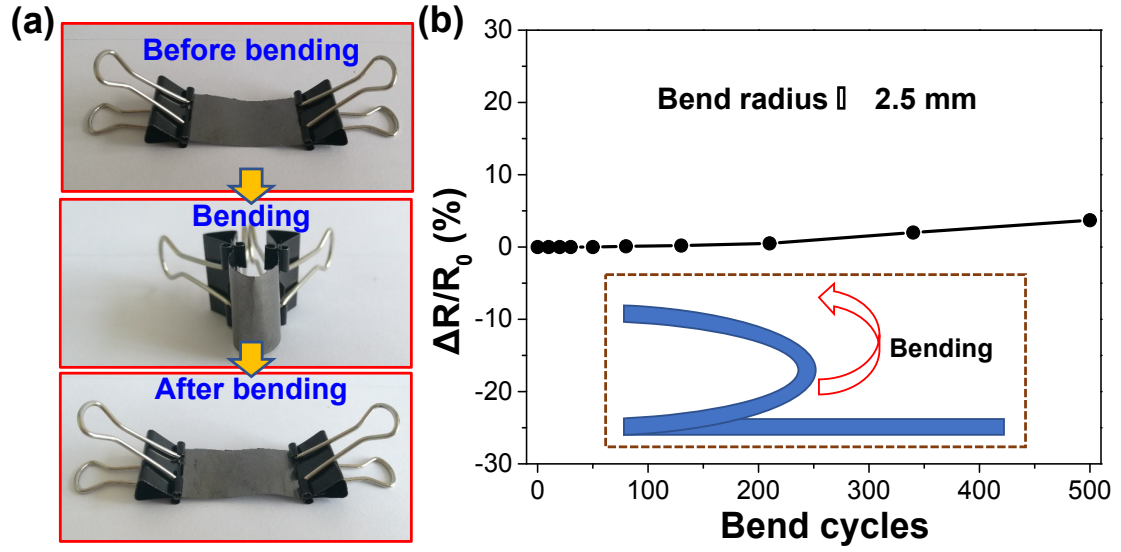

**Fig S1.** (a) A schematic for the bending process of the film (bend radius < 2.5 mm, 500 times). (b) Resistance change of the TSPG film under a repeatedly bending process.

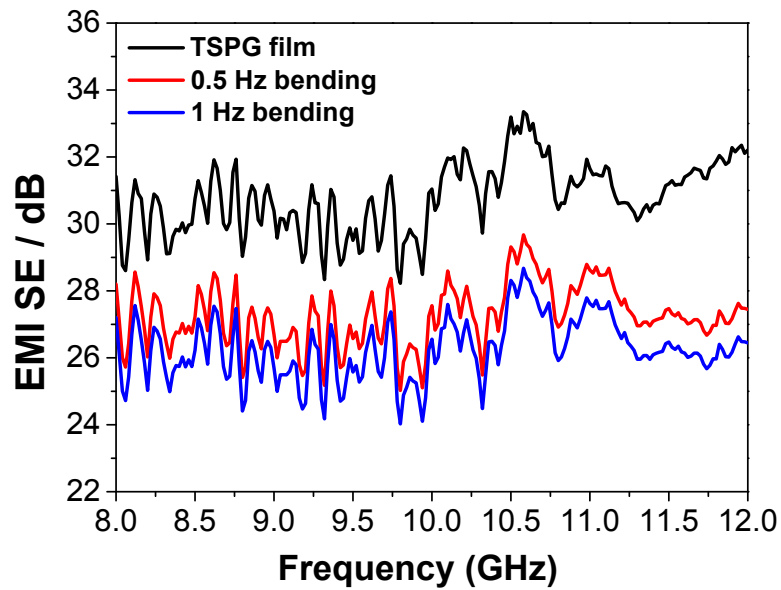

**Fig S2.** EMI shielding effectiveness of a TSPG film before and after repeatedly bending to a radius of 2.5 mm 500 cycles.

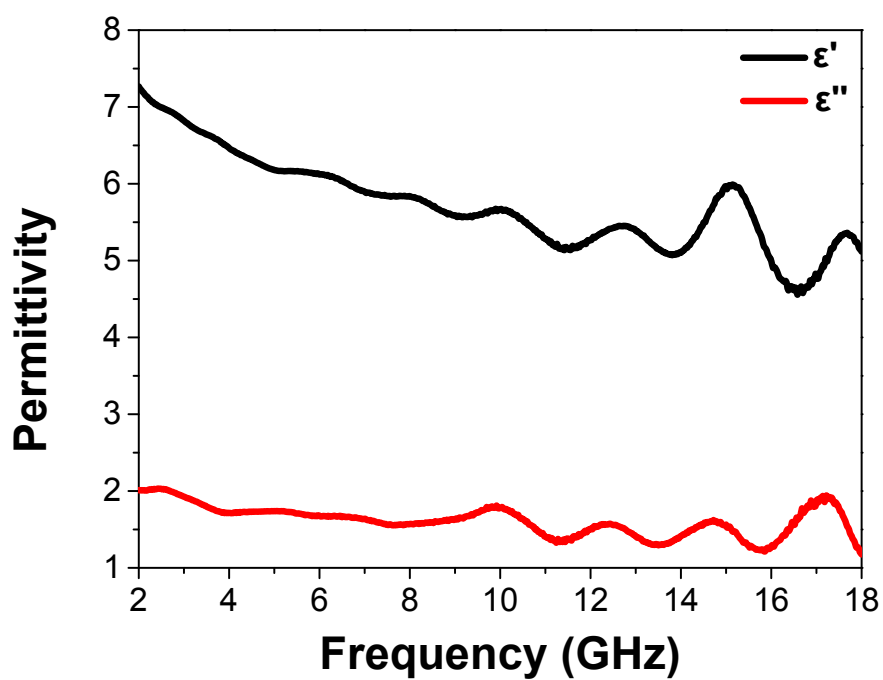

**Fig S3.** Permittivity of TSPG film in the frequency range of 2-18 GHz.

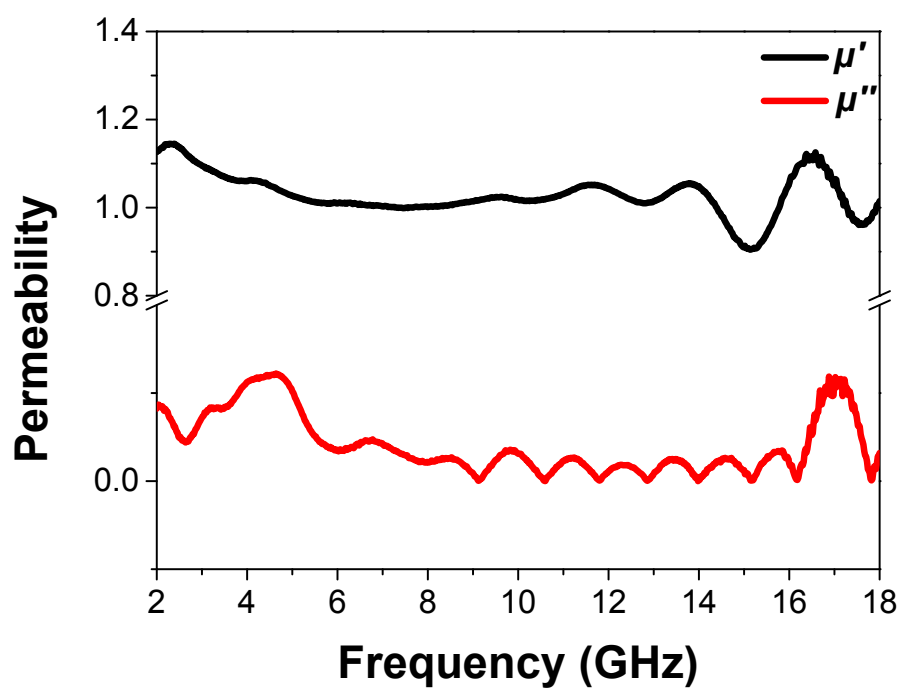

**Fig S4.** Permeability of TSPG film in the frequency range of 2-18 GHz.
